# Supplementary material for: Azetidinium Lead Halide Ruddlesden–Popper Phases
Source: MDPI journal article supplement (doi:10.3390/molecules26216474), 2021-10-27
Supplement: s1 [file s1]

# Supporting Information

## Azetidinium lead halide Ruddlesden-Popper phases

Jiyu Tian<sup>1,2</sup>, Eli Zysman-Colman<sup>2,\*</sup> and Finlay D. Morrison<sup>1,\*</sup>

<sup>1</sup>EaStCHEM School of Chemistry, University of St Andrews, St Andrews, Fife, KY16 9ST, United Kingdom.

<sup>2</sup>Organic Semiconductor Centre, EaStCHEM School of Chemistry, University of St Andrews, St Andrews, Fife, KY16 9ST, United Kingdom.

<sup>1,2</sup>[t201@st-andrews.ac.uk](mailto:t201@st-andrews.ac.uk), Corresponding authors: <sup>2,\*</sup>[eli.zysman-colman@st-andrews.ac.uk](mailto:eli.zysman-colman@st-andrews.ac.uk); <sup>1,\*</sup>[finlay.morrison@st-andrews.ac.uk](mailto:finlay.morrison@st-andrews.ac.uk)

### Table of Contents

|                                                                           |   |
|---------------------------------------------------------------------------|---|
| Theoretical PXRD patterns of $\text{Az}_2\text{PbX}_4$ (X = Cl, Br) ..... | 1 |
| Precipitation synthesis of $\text{Az}_2\text{PbX}_4$ (X = Cl, Br) .....   | 2 |
| Attempted synthesis of $\text{Az}_2\text{PbI}_4$ .....                    | 3 |
| References .....                                                          | 5 |

### Theoretical PXRD patterns of $\text{Az}_2\text{PbX}_4$ (X = Cl, Br)

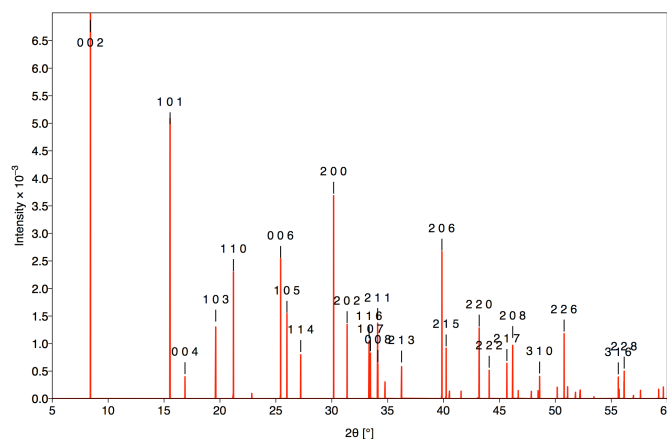

**Figure S1.** Theoretical PXRD patterns of  $\text{Az}_2\text{PbBr}_4$  with indexing of major peaks.

### Precipitation synthesis of $\text{Az}_2\text{PbX}_4$ ( $\text{X} = \text{Cl}, \text{Br}$ )

$\text{Az}_2\text{PbCl}_4$  samples were prepared by dissolving  $\text{AzCl}$  and  $\text{PbCl}_2$  (2:1) in DMSO (2 mL, 0.4 M  $\text{PbCl}_2$ ) at room temperature and in air. The reaction mixture was stirred for 1 h whereupon clear solutions were obtained. Acetone (15 mL) was added slowly into the solution and the vial was shaken for 1 min and then left to stand for 10 min before vacuum filtration. The resulting powders were washed with  $2 \times 10$  mL acetone and then dried under vacuum for 24 h. The obtained samples were white powders.

Precipitation synthesis attempts of  $\text{Az}_2\text{PbBr}_4$  samples were carried out by mixing appropriate molar ratios  $\text{AzBr}$  and  $\text{PbBr}_2$  (2:1) in DMF/DMSO (3:1, 0.3 M  $\text{PbBr}_2$ ) at room temperature. Sonication and stirring were applied to aid in the dissolution of the reagents. DCM (20 mL) was added slowly into the solution and the vial was shaken for 1 min and then left to stand for 2 min before vacuum filtration. The resulting powders were washed with  $2 \times 10$  mL DCM and then dried under vacuum for 24 h.

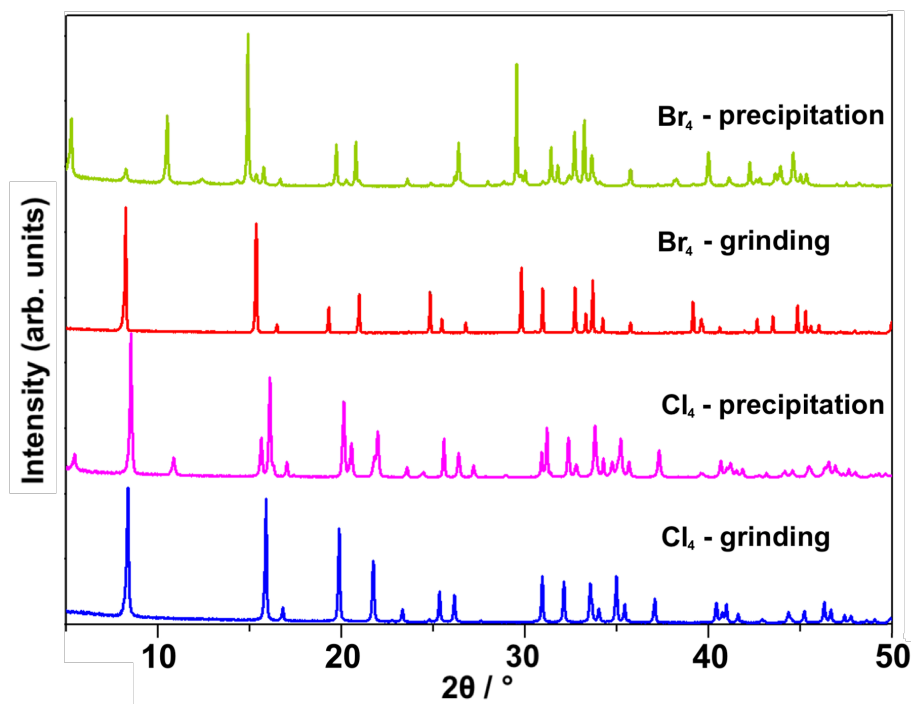

**Figure S2.** PXRD data of  $\text{Az}_2\text{PbX}_4$  ( $\text{X} = \text{Cl}, \text{Br}$ ) prepared by mechanosynthesis and precipitation synthesis.

### Attempted synthesis of $\text{Az}_2\text{PbI}_4$

$\text{AzI}$  was synthesised according to our previous study.[1] Appropriate molar ratios of dry  $\text{AzI}$  and  $\text{PbI}_2$  ( $\text{AzI}:\text{PbI}_2 = 2:1$ ) were ground together in a Fritsch Pulverisette planetary ball mill at 600 rpm for 1 h either single or multiple times (e.g.,  $\text{Az}_2\text{PbI}_4$ -ballmill\_3h indicates  $3 \times 1$ -hour grinding). 60 cm<sup>3</sup> Teflon pots and high-wear-resistant zirconia media, which are nine zirconia grinding media 10 mm diameter spheres, were used in the synthesis.  $\text{Az}_2\text{PbI}_4$  samples were attempted by hand grinding.  $\text{AzI}$  and  $\text{PbI}_2$  mixtures were ground by hand with a mortar and pestle for  $4 \times 15$  min.

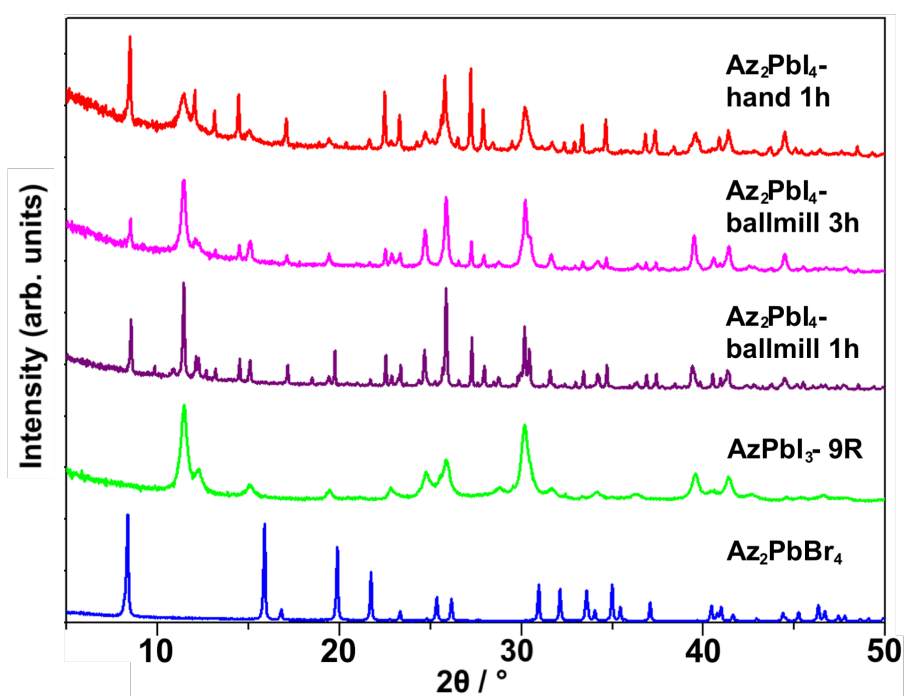

**Figure S3.** PXRD data of attempted syntheses of  $\text{Az}_2\text{PbI}_4$  prepared by hand grinding and ball mill mechanosynthesis. For reference, PXRD data for previously prepared R-P  $\text{Az}_2\text{PbBr}_4$  and 9R perovskite  $\text{AzPbI}_3$  phases[2] prepared by mechanosynthesis are also shown.

Table S1. Selected crystallographic data obtained powder X-ray diffraction of samples prepared by mechanosynthesis.

|                                   | Az <sub>2</sub> PbCl <sub>4</sub>                                | Az <sub>2</sub> PbBr <sub>0.67</sub> Cl <sub>3.33</sub>                                | Az <sub>2</sub> PbBr <sub>1.33</sub> Cl <sub>2.67</sub>                                | Az <sub>2</sub> PbBr <sub>2</sub> Cl <sub>2</sub>                                | Az <sub>2</sub> PbBr <sub>2.67</sub> Cl <sub>1.33</sub>                                | Az <sub>2</sub> PbBr <sub>0.67</sub> Cl <sub>3.33</sub>                                | Az <sub>2</sub> PbBr <sub>4</sub>                                |
|-----------------------------------|------------------------------------------------------------------|----------------------------------------------------------------------------------------|----------------------------------------------------------------------------------------|----------------------------------------------------------------------------------|----------------------------------------------------------------------------------------|----------------------------------------------------------------------------------------|------------------------------------------------------------------|
| temperature [K]                   | 293                                                              | 293                                                                                    | 293                                                                                    | 293                                                                              | 293                                                                                    | 293                                                                                    | 293                                                              |
| empirical formula                 | C <sub>6</sub> H <sub>16</sub> Cl <sub>4</sub> N <sub>2</sub> Pb | C <sub>6</sub> H <sub>16</sub> Br <sub>0.67</sub> Cl <sub>3.33</sub> N <sub>2</sub> Pb | C <sub>6</sub> H <sub>16</sub> Br <sub>1.33</sub> Cl <sub>2.67</sub> N <sub>2</sub> Pb | C <sub>6</sub> H <sub>16</sub> Br <sub>2</sub> Cl <sub>2</sub> N <sub>2</sub> Pb | C <sub>6</sub> H <sub>16</sub> Br <sub>2.67</sub> Cl <sub>1.33</sub> N <sub>2</sub> Pb | C <sub>6</sub> H <sub>16</sub> Br <sub>0.67</sub> Cl <sub>3.33</sub> N <sub>2</sub> Pb | C <sub>6</sub> H <sub>16</sub> Br <sub>4</sub> N <sub>2</sub> Pb |
| fw                                | 554.12                                                           | 568.94                                                                                 | 583.75                                                                                 | 598.57                                                                           | 613.39                                                                                 | 628.20                                                                                 | 643.02                                                           |
| crystal description               | Colorless prism                                                  | Colorless prism                                                                        | Colorless prism                                                                        | Yellow prism                                                                     | Yellow prism                                                                           | Yellow prism                                                                           | Yellow prism                                                     |
| space group                       | <i>I4/mmc</i>                                                    | <i>I4/mmc</i>                                                                          | <i>I4/mmc</i>                                                                          | <i>I4/mmc</i>                                                                    | <i>I4/mmc</i>                                                                          | <i>I4/mmc</i>                                                                          | <i>I4/mmc</i>                                                    |
| <i>a</i> [Å]                      | 5.765(0)                                                         | 5.786(9)                                                                               | 5.814(5)                                                                               | 5.850(5)                                                                         | 5.893(9)                                                                               | 5.942(1)                                                                               | 5.993(6)                                                         |
| <i>c</i> [Å]                      | 21.027(2)                                                        | 21.154(0)                                                                              | 21.260(6)                                                                              | 21.354(6)                                                                        | 21.415(8)                                                                              | 21.464(3)                                                                              | 21.501(1)                                                        |
| vol [Å] <sup>3</sup>              | 698.85(2)                                                        | 708.41(8)                                                                              | 718.80(1)                                                                              | 730.93(3)                                                                        | 743.95(1)                                                                              | 757.86(5)                                                                              | 772.41(1)                                                        |
| <i>Z</i>                          | 2                                                                | 2                                                                                      | 2                                                                                      | 2                                                                                | 2                                                                                      | 2                                                                                      | 2                                                                |
| GOF                               | 0.1052                                                           | 0.0868                                                                                 | 0.0779                                                                                 | 0.0824                                                                           | 0.0934                                                                                 | 0.1664                                                                                 | 0.1370                                                           |
| $\chi^2$                          | 7.203                                                            | 5.984                                                                                  | 5.380                                                                                  | 5.471                                                                            | 8.026                                                                                  | 14.49                                                                                  | 10.23                                                            |
| <i>wR</i> <sub>2</sub> (all data) | 0.1019                                                           | 0.0955                                                                                 | 0.0853                                                                                 | 0.0807                                                                           | 0.0906                                                                                 | 0.1409                                                                                 | 0.1155                                                           |

## References

1. Tian, J.; Zysman-Colman, E.; Morrison, F.D. Compositional Variation in Hybrid Organic-Inorganic Lead Halide Perovskites: Kinetically versus Thermodynamically Controlled Synthesis. *Chem. Mater.* **2021**, *33*, 3650–3659, doi:10.1021/acs.chemmater.1c00470.
2. Tian, J.; Cordes, D.B.; Slawin, A.M.Z.; Zysman-Colman, E.; Morrison, F.D. Progressive Polytypism and Bandgap Tuning in Azetidinium Lead Halide Perovskites. *Inorg. Chem.* **2021**, *60*, 12247–12254, doi:10.1021/acs.inorgchem.1c01425.
